# Supplementary material
Source: ML conference proceedings conference paper supplement (https://proceedings.neurips.cc/paper_files/paper/2007/hash/d516b13671a4179d9b7b458a6ebdeb92-Abstract.html)
Supplement: Supplementary file [file d516b13671a4179d9b7b458a6ebdeb92-Supplemental.zip]

# Privacy-Preserving Belief Propagation and Sampling

Michael Kearns, Jinsong Tan, and Jennifer Wortman

University of Pennsylvania (Poster T46)

## Why do we need privacy?

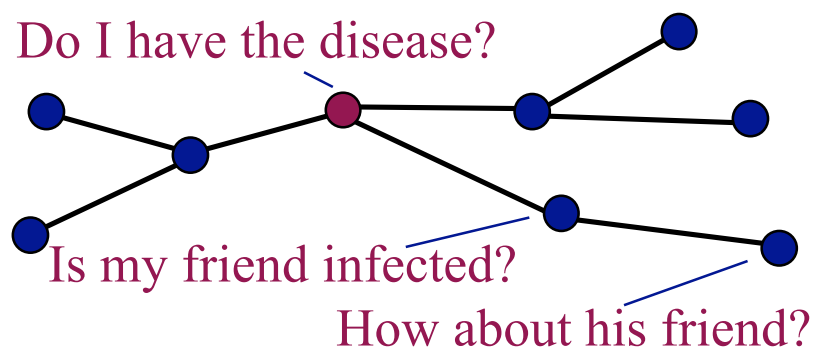

- What is the probability  $p$  that I have been infected?
- Can my neighbors help me calculate  $p$  without revealing any other information?
- Our solutions fuse tools from learning and cryptography
  - Inference in belief networks
  - Secure function computation
- The result is a distributed protocol that remains faithful to the network topology
- Need more details?
  - Call **1-800-MY-PRIVACY**
  - Or visit our **POSTER!!!**
